# Supplementary material
Source: publisher figshare collection journal article supplement (https://acs.figshare.com/ndownloader/files/4779448)
Supplement: Supplementary file 1 [file 4779448]

 

data_LiC211Cs 

 

_audit_creation_method            SHELXL 

_chemical_name_systematic 

; 

 ? 

; 

_chemical_name_common             ? 

_chemical_formula_moiety          ? 

_chemical_formula_structural      ? 

_chemical_formula_analytical      ? 

_chemical_formula_sum             'C14 H28 Cs Li N2 O4' 

_chemical_formula_weight          428.23 

_chemical_melting_point           ? 

_chemical_compound_source         ? 

 

loop_ 

 _atom_type_symbol 

 _atom_type_description 

 _atom_type_scat_dispersion_real 

 _atom_type_scat_dispersion_imag 

 _atom_type_scat_source 

 'C'  'C'   0.0033   0.0016 

 'International Tables Vol C Tables 4.2.6.8 and 6.1.1.4' 

 'H'  'H'   0.0000   0.0000 

 'International Tables Vol C Tables 4.2.6.8 and 6.1.1.4' 

 'O'  'O'   0.0106   0.0060 

 'International Tables Vol C Tables 4.2.6.8 and 6.1.1.4' 

 'N'  'N'   0.0061   0.0033 

 'International Tables Vol C Tables 4.2.6.8 and 6.1.1.4' 

 'Li'  'Li'  -0.0003   0.0001 

 'International Tables Vol C Tables 4.2.6.8 and 6.1.1.4' 

 'Cs'  'Cs'  -0.3680   2.1192 

 'International Tables Vol C Tables 4.2.6.8 and 6.1.1.4' 

 

_symmetry_cell_setting            monoclinic 

_symmetry_space_group_name_H-M    C2/m

 

loop_ 

 _symmetry_equiv_pos_as_xyz 

 'x, y, z' 

 'x, -y, z' 

 'x+1/2, y+1/2, z' 

 'x+1/2, -y+1/2, z' 

 '-x, -y, -z' 

 '-x, y, -z' 

 '-x+1/2, -y+1/2, -z' 

 '-x+1/2, y+1/2, -z' 

 

_cell_length_a                    23.748(15) 

_cell_length_b                    13.434(8) 

_cell_length_c                    8.212(12) 

_cell_angle_alpha                 90.00 

_cell_angle_beta                  75.34(9) 

_cell_angle_gamma                 90.00 

_cell_volume                      2534.6(43) 

_cell_formula_units_Z             4 

_cell_measurement_temperature     173(2) 

_cell_measurement_reflns_used     ? 

_cell_measurement_theta_min       ? 

_cell_measurement_theta_max       ? 

 

_exptl_crystal_description        ? 

_exptl_crystal_colour             ? 

_exptl_crystal_size_max           0.7 

_exptl_crystal_size_mid           0.4

_exptl_crystal_size_min           0.3

_exptl_crystal_density_meas       ? 

_exptl_crystal_density_diffrn     1.122 

_exptl_crystal_density_method     ? 

_exptl_crystal_F_000              864 

_exptl_absorpt_coefficient_mu     1.472 

_exptl_absorpt_correction_type    ? 

_exptl_absorpt_correction_T_min   ? 

_exptl_absorpt_correction_T_max   ? 

 

_exptl_special_details 

; 

 ? 

; 

 

_diffrn_ambient_temperature       173(2) 

_diffrn_radiation_wavelength      0.71069 

_diffrn_radiation_type            MoK\a 

_diffrn_radiation_source          'fine-focus sealed tube' 

_diffrn_radiation_monochromator   graphite 

_diffrn_measurement_device        ? 

_diffrn_measurement_method        ? 

_diffrn_standards_number          ? 

_diffrn_standards_interval_count  ? 

_diffrn_standards_interval_time   ? 

_diffrn_standards_decay_%         ? 

_diffrn_reflns_number             1893 

_diffrn_reflns_av_R_equivalents   0.2611 

_diffrn_reflns_av_sigmaI/netI     0.0897 

_diffrn_reflns_limit_h_min        -25 

_diffrn_reflns_limit_h_max        24 

_diffrn_reflns_limit_k_min        0 

_diffrn_reflns_limit_k_max        14 

_diffrn_reflns_limit_l_min        -8 

_diffrn_reflns_limit_l_max        0 

_diffrn_reflns_theta_min          2.56 

_diffrn_reflns_theta_max          22.54 

_reflns_number_total              1752 

_reflns_number_observed           1026 

_reflns_observed_criterion        >2sigma(I) 

 

_computing_data_collection        ? 

_computing_cell_refinement        ? 

_computing_data_reduction         ? 

_computing_structure_solution     'SHELXS-86 (Sheldrick, 1990)' 

_computing_structure_refinement   'SHELXL-93 (Sheldrick, 1993)' 

_computing_molecular_graphics     ? 

_computing_publication_material   ? 

 

_refine_special_details 

; 

 Refinement on F^2^ for ALL reflections except for 0 with very negative F^2^ 

 or flagged by the user for potential systematic errors.  Weighted R-factors 

 wR and all goodnesses of fit S are based on F^2^, conventional R-factors R 

 are based on F, with F set to zero for negative F^2^. The observed criterion 

 of F^2^ > 2sigma(F^2^) is used only for calculating _R_factor_obs etc. and is 

 not relevant to the choice of reflections for refinement.  R-factors based 

 on F^2^ are statistically about twice as large as those based on F, and R- 

 factors based on ALL data will be even larger. 

; 

 

_refine_ls_structure_factor_coef  Fsqd  

_refine_ls_matrix_type            full 

_refine_ls_weighting_scheme 

 'calc w=1/[\s^2^(Fo^2^)+(0.2344P)^2^+5.6055P] where P=(Fo^2^+2Fc^2^)/3' 

_atom_sites_solution_primary      direct 

_atom_sites_solution_secondary    difmap 

_atom_sites_solution_hydrogens    geom 

_refine_ls_hydrogen_treatment     ? 

_refine_ls_extinction_method      none 

_refine_ls_extinction_coef        ? 

_refine_ls_number_reflns          1752 

_refine_ls_number_parameters      106 

_refine_ls_number_restraints      0 

_refine_ls_R_factor_all           0.1677 

_refine_ls_R_factor_obs           0.1194 

_refine_ls_wR_factor_all          0.3558 

_refine_ls_wR_factor_obs          0.3003 

_refine_ls_goodness_of_fit_all    1.028 

_refine_ls_goodness_of_fit_obs    1.131 

_refine_ls_restrained_S_all       1.028 

_refine_ls_restrained_S_obs       1.131 

_refine_ls_shift/esd_max          -0.027 

_refine_ls_shift/esd_mean         0.005 

 

loop_ 

 _atom_site_label 

 _atom_site_type_symbol 

 _atom_site_fract_x 

 _atom_site_fract_y 

 _atom_site_fract_z 

 _atom_site_U_iso_or_equiv 

 _atom_site_thermal_displace_type 

 _atom_site_occupancy 

 _atom_site_calc_flag 

 _atom_site_refinement_flags 

 _atom_site_disorder_group 

Cs Cs 0.40513(7) 0.0000 0.8213(3) 0.1209(11) Uani 1 d S . 

Li Li 0.1016(9) 0.0000 0.6788(29) 0.052(6) Uani 1 d S . 

O4 O 0.0279(4) 0.0956(8) 0.7277(11) 0.081(3) Uani 1 d . . 

O8 O 0.1485(5) 0.0000 0.4177(14) 0.078(4) Uani 1 d S . 

O11 O 0.1414(5) 0.0000 0.8843(12) 0.073(4) Uani 1 d S . 

N1 N 0.1407(7) 0.1521(14) 0.6527(16) 0.099(5) Uani 1 d . . 

C2 C 0.0965(13) 0.2258(17) 0.6775(23) 0.129(8) Uani 1 d . . 

H2A H 0.1002(13) 0.2680(17) 0.7702(23) 0.154 Uiso 1 calc R . 

H2B H 0.1038(13) 0.2672(17) 0.5776(23) 0.154 Uiso 1 calc R . 

C3 C 0.0383(18) 0.1916(19) 0.7117(51) 0.238(19) Uani 1 d . . 

H3A H 0.0168(18) 0.2234(19) 0.8149(51) 0.286 Uiso 1 calc R . 

H3B H 0.0219(18) 0.2156(19) 0.6222(51) 0.286 Uiso 1 calc R . 

C5 C -0.0262(6) 0.0492(15) 0.7605(20) 0.120(8) Uani 1 d . . 

H5A H -0.0490(6) 0.0716(15) 0.8696(20) 0.144 Uiso 1 calc R . 

H5B H -0.0459(6) 0.0716(15) 0.6772(20) 0.144 Uiso 1 calc R . 

C6 C 0.1815(11) 0.1581(19) 0.4884(31) 0.150(9) Uani 1 d . . 

H6A H 0.1752(11) 0.2205(19) 0.4361(31) 0.179 Uiso 1 calc R . 

H6B H 0.2207(11) 0.1595(19) 0.5037(31) 0.179 Uiso 1 calc R . 

C7 C 0.1780(12) 0.0864(30) 0.3872(23) 0.270(23) Uani 1 d . . 

H7A H 0.2180(12) 0.0671(30) 0.3375(23) 0.324 Uiso 1 calc R . 

H7B H 0.1646(12) 0.1175(30) 0.2973(23) 0.324 Uiso 1 calc R . 

C9 C 0.1721(10) 0.0886(24) 0.8798(24) 0.172(12) Uani 1 d . . 

H9A H 0.1581(10) 0.1179(24) 0.9906(24) 0.207 Uiso 1 calc R . 

H9B H 0.2121(10) 0.0692(24) 0.8708(24) 0.207 Uiso 1 calc R . 

C10 C 0.1748(15) 0.1602(21) 0.7760(43) 0.205(15) Uani 1 d . . 

H10A H 0.2153(15) 0.1686(21) 0.7154(43) 0.246 Uiso 1 calc R . 

H10B H 0.1630(15) 0.2206(21) 0.8404(43) 0.246 Uiso 1 calc R . 

 

loop_ 

 _atom_site_aniso_label 

 _atom_site_aniso_U_11 

 _atom_site_aniso_U_22 

 _atom_site_aniso_U_33 

 _atom_site_aniso_U_23 

 _atom_site_aniso_U_13 

 _atom_site_aniso_U_12 

Cs 0.1091(14) 0.0786(12) 0.178(2) 0.000 -0.0416(12) 0.000 

Li 0.033(12) 0.088(18) 0.040(13) 0.000 -0.019(10) 0.000 

O4 0.072(6) 0.093(7) 0.074(6) 0.015(5) -0.008(4) 0.015(5) 

O8 0.043(6) 0.145(12) 0.045(7) 0.000 -0.012(5) 0.000 

O11 0.064(7) 0.133(11) 0.026(6) 0.000 -0.017(5) 0.000 

N1 0.123(11) 0.126(12) 0.063(8) 0.019(8) -0.054(8) -0.055(10) 

C2 0.206(26) 0.097(15) 0.087(12) 0.017(10) -0.045(14) -0.058(18) 

C3 0.268(44) 0.081(16) 0.407(58) -0.047(23) -0.162(40) 0.094(23) 

C5 0.057(8) 0.206(24) 0.096(10) -0.036(11) -0.015(7) 0.006(10) 

C6 0.161(19) 0.155(20) 0.127(19) 0.034(15) -0.025(17) -0.078(17) 

C7 0.257(29) 0.482(53) 0.052(11) 0.000(19) -0.004(13) -0.290(37) 

C9 0.165(18) 0.290(31) 0.088(13) 0.052(16) -0.081(13) -0.146(22) 

C10 0.279(32) 0.176(24) 0.241(31) 0.060(22) -0.216(29) -0.119(24) 

 

_geom_special_details 

; 

 All esds (except the esd in the dihedral angle between two l.s. planes) 

 are estimated using the full covariance matrix.  The cell esds are taken 

 into account individually in the estimation of esds in distances, angles 

 and torsion angles; correlations between esds in cell parameters are only 

 used when they are defined by crystal symmetry.  An approximate (isotropic) 

 treatment of cell esds is used for estimating esds involving l.s. planes. 

; 

 

loop_ 

 _geom_bond_atom_site_label_1 

 _geom_bond_atom_site_label_2 

 _geom_bond_distance 

 _geom_bond_site_symmetry_2 

 _geom_bond_publ_flag 

Li O4 2.13(2) . ? 

Li O4 2.13(2) 2 ? 

Li O11 2.13(2) . ? 

Li O8 2.15(3) . ? 

Li N1 2.23(2) 2 ? 

Li N1 2.23(2) . ? 

O4 C3 1.31(3) . ? 

O4 C5 1.39(2) . ? 

O8 C7 1.35(3) 2 ? 

O8 C7 1.35(3) . ? 

O11 C9 1.39(2) 2 ? 

O11 C9 1.39(2) . ? 

N1 C2 1.42(3) . ? 

N1 C6 1.45(2) . ? 

N1 C10 1.45(2) . ? 

C2 C3 1.42(4) . ? 

C5 C5 1.32(4) 2 ? 

C6 C7 1.29(3) . ? 

C9 C10 1.28(3) . ? 

 

loop_ 

 _geom_angle_atom_site_label_1 

 _geom_angle_atom_site_label_2 

 _geom_angle_atom_site_label_3 

 _geom_angle 

 _geom_angle_site_symmetry_1 

 _geom_angle_site_symmetry_3 

 _geom_angle_publ_flag 

O4 Li O4 74.4(9) . 2 ? 

O4 Li O11 111.0(9) . . ? 

O4 Li O11 111.0(9) 2 . ? 

O4 Li O8 112.5(8) . . ? 

O4 Li O8 112.5(8) 2 . ? 

O11 Li O8 124.5(11) . . ? 

O4 Li N1 150.9(10) . 2 ? 

O4 Li N1 76.5(6) 2 2 ? 

O11 Li N1 79.6(6) . 2 ? 

O8 Li N1 78.8(7) . 2 ? 

O4 Li N1 76.5(6) . . ? 

O4 Li N1 150.9(10) 2 . ? 

O11 Li N1 79.6(6) . . ? 

O8 Li N1 78.8(7) . . ? 

N1 Li N1 132.6(14) 2 . ? 

C3 O4 C5 127.0(20) . . ? 

C3 O4 Li 116.7(18) . . ? 

C5 O4 Li 116.1(10) . . ? 

C7 O8 C7 119.1(35) 2 . ? 

C7 O8 Li 107.4(11) 2 . ? 

C7 O8 Li 107.4(11) . . ? 

C9 O11 C9 117.6(27) 2 . ? 

C9 O11 Li 108.2(10) 2 . ? 

C9 O11 Li 108.3(10) . . ? 

C2 N1 C6 113.0(16) . . ? 

C2 N1 C10 111.7(21) . . ? 

C6 N1 C10 106.5(21) . . ? 

C2 N1 Li 110.6(11) . . ? 

C6 N1 Li 107.7(14) . . ? 

C10 N1 Li 107.1(14) . . ? 

C3 C2 N1 116.8(17) . . ? 

O4 C3 C2 119.2(21) . . ? 

C5 C5 O4 116.7(8) 2 . ? 

C7 C6 N1 115.0(18) . . ? 

C6 C7 O8 129.8(17) . . ? 

C10 C9 O11 126.9(15) . . ? 

C9 C10 N1 117.8(19) . . ? 

 

_refine_diff_density_max    1.764 

_refine_diff_density_min   -0.970 

_refine_diff_density_rms    0.166 
